# Supplementary material for: Towards a modular architecture for science factories
Source: Royal Society of Chemistry journal article supplement (doi:10.1039/d3dd00142c), 2023-01-01
Supplement: d3dd00142c1.pdf [file d3dd00142c1.pdf]

## A Supplementary information

Supplementary Information document for article *Towards a Modular Architecture for Science Factories* by Rafael Vescovi, Tobias Ginsburg, Kyle Hippe, Doga Ozgulbas, Casey Stone, Abraham Stroka, Rory Butler, Ben Blaiszik, Tom Brettin, Kyle Chard, Mark Hereld, Arvind Ramanathan, Rick Stevens, Aikaterini Vriza, Jie Xu, Qingteng Zhang, and Ian Foster.

### A.1 An example workcell specification: RPL

We present below the YAML description of the workcell illustrated in [Figure 8](#). This workcell is used by both the PCR workflow in [Section A.2](#) and the color picker workflow in [Section A.3](#).

In summary: A configuration block (lines 4–11) give identifiers for external services that may be used when running the workcell, and Line 12 gives the coordinates of the workcell in the laboratory. Lines 15–135 provide for each module in the workcell the following information. **Name**: A name for this module instance, unique within the workcell. **Model**: A name for the physical component name in the module. **Interface**: The adapter used by the module: e.g., `wei_ros_node` to indicate that actions will be sent over a ROS service. **Config**: Configuration information, e.g., a ROS channel name. **workcell\_coordinates**: The physical location(s) of the component, expressed as an (X, Y, Z) position relative to the workcell origin, plus a four-element quaternion representing orientation. Finally, lines 137 forward present the locations of the various exchange locations in the workcell, most as seven-element pf400 joint values.

Listing 1. Example workcell specification, `rpl_modular_workcell.yaml`

```
1 name: RPL_Modular_workcell
2
3 #Info about data processing and location of the workcell
4 config:
5   globus_compute_local: "299edea0-db9a-4693-84ba-babfa655b1be"
6   globus_transfer_local: ""
7   ##
8   globus_search_index: "aefcecc6-e554-4f8c-a25b-147f23091944"
9   globus_portal_ep: "bb8d048a-2cad-4029-a9c7-671ec5d1f84d"
10  ##
11  globus_group: "dda56f31-53d1-11ed-bd8b-0db7472df7d6"
12  workcell_origin_coordinates: [9.4307, -10.4176, 0, 1, 0, 0, 0]
13
14 #List of all components accessible in this workcell
15 modules:
16
17   #Human-legible name specific to an individual component
18   - name: sealer
19
20     #Type of device being connected to, might be multiple components of same
21     #model with different names in a workcell
22     model: A4S_sealer
23
24     #Method of communication with the device
25     interface: wei_ros_node
26
27     #Relevant communication configuration
28     config:
29
30       #In this case, the ROS service used to send actions to the component
31       ros_node_address: "/std_ns/SealerNode"
32
33     # X, Y, Z, Q0, Q1, Q2, Q3 relative to workcell_origin_coordinates
34     workcell_coordinates: [0.8209, 0.7264, 1.0514, 0.7071, 0, 0, 0.7071]
35
36   - name: pf400
37     model: pf400
```

```

38     interface: wei_ros_node
39     config:
40         ros_node_address: "/std_ns/pf400Node"
41     workcell_coordinates: [0, -0.0321, 0.8420, 0.7071, 0, 0, 0.7071]
42
43 - name: sciclops
44     model: sciclops
45     interface: wei_ros_node
46     config:
47         ros_node_address: "/std_ns/SciclopsNode"
48     workcell_coordinates: [0.5713, 1.0934, 1.0514, 0.9831, 0, 0, 0.1826]
49
50 - name: peeler
51     model: brooks_xpeel
52     interface: wei_ros_node
53     config:
54         ros_node_address: "/std_ns/PeelerNode"
55     workcell_coordinates: [0.7464, 0.3862, 1.0514, 0.7071, 0, 0, 0.7071]
56
57 - name: ot2_pcr_alpha
58     model: ot2
59     interface: wei_ros_node
60     config:
61         ros_node_address: "/std_ns/ot2_pcr_alpha"
62     workcell_coordinates: [0.7400, -0.2678, 1.0514, 0.7071, 0, 0, 0.7071]
63
64 - name: ot2_growth_beta
65     model: ot2
66     interface: wei_ros_node
67     config:
68         ros_node_address: "/std_ns/ot2_growth_beta"
69     workcell_coordinates: [0.7071, 0, 0, 0.7071, 0.7071, 0, 0, 0.7071]
70
71 - name: ot2_cp_gamma
72     model: ot2
73     interface: wei_ros_node
74     config:
75         ros_node_address: "/std_ns/ot2_cp_gamma"
76     workcell_coordinates: [-0.7315, -1.0018, 1.0514, -0.7071, 0, 0, 0.7071]
77
78 - name: biometra
79     model: biometra (96well)
80     interface: wei_ros_node
81     config:
82         ros_node_address: "/std_ns/biometra96"
83     workcell_coordinates: [-0.6283, 0.6415, 1.0514, 0.7071, 0, 0, -0.7071]
84
85 - name: biometra_192
86     model: biometra (192well)
87     interface: wei_ros_node
88     config:
89         ros_node_address: "/std_ns/biometra_192"
90     workcell_coordinates: [-0.6283, 0.3481, 1.0514, 0.7071, 0, 0, -0.7071]
91
92 - name: camera_module
93     model: camera (logitech)

```

```

94     interface: wei_ros_camera
95     config:
96       ros_node_address: "/std_ns/camera_module"
97     workcell_coordinates: [0,0,0,1,0,0,0]
98
99   - name: hidex
100     model: Hidex
101     interface: wei_tcp_node
102     workcell_coordinates: [0,0,0,1,0,0,0]
103     config:
104       tcp_node_address: "146.137.240.22"
105       tcp_node_port: 2000
106
107   - name: barty
108     model: RPL BARTY
109     interface: wei_rest_node
110     workcell_coordinates: [0,0,0,1,0,0,0]
111     config:
112       rest_node_address: "http://barty.cels.anl.gov:8000"
113       rest_node_auth: ""
114
115   - name: MiR_base
116     model: MiR250
117     interface: wei_rest_node
118     workcell_coordinates: [0,0,0,1,0,0,0]
119     config:
120       rest_node_address: "http://mirbase1.cels.anl.gov/api/v2.0.0/"
121       rest_node_auth: "/home/rpl/Documents/mirauth.txt"
122
123   - name: ur5
124     model: ur5
125     interface: wei_ros_node
126     workcell_coordinates: [0,0,0,1,0,0,0]
127     config:
128       ros_node_address: "/ur5_client/UR5_Client_Node"
129
130 locations:
131   pf400: #Joint angles for the PF400 Plate Handler
132     sciclops.exchange: [222.0, -38.068, 335.876, 325.434, 79.923, 995.062]
133     sealer.default: [205.128, -2.814, 264.373, 365.863, 79.144, 411.553]
134     peeler.default: [225.521, -24.846, 244.836, 406.623, 80.967, 398.778]
135     ot2_pcr_alpha.deck1_cooler: [247.999, -30.702, 275.835, 381.513, 124.830, -585.403]
136     ot2_growth_beta.deck2: [163.230, -59.032, 270.965, 415.013, 129.982, -951.510]
137     ot2_cp_gamma.deck2: [156, 66.112, 83.90, 656.404, 119.405, -946.818]
138     biometra.default: [247.0, 40.698, 38.294, 728.332, 123.077, 301.082]
139     camera_module.plate_station: [90.597,26.416, 66.422, 714.811, 81.916, 995.074]
140     wc.trash: [218.457, -2.408, 38.829, 683.518, 89.109, 995.074]
141   sciclops: #Joint angles for the Sciclops Plate Crane
142     sciclops.exchange: [0,0,0,0]
143   workcell: #Coordinates relative to the workcell origin
144     sciclops.exchange: [0.7400, -0.2678, 1.0514, 0.7071, 0, 0, 0.7071]

```

## A.2 An example workflow specification: PCR

We show here the YAML description of the PCR workflow described in [Section 4.2](#). Lines 2-5 provide metadata; lines 9–15 list the modules to be used; and lines 19 forward describe the workflow steps.

Listing 2. Example workflow specification, pcr\_demo\_wf.yaml

```

1 name: PCR - Workflow
2
3 metadata:
4   author: RPL Team
5   info: Example workflow for WEI
6   version: 0.1
7
8 #This is a list of modules used in the workflow
9 modules:
10  - name: ot2_pcr_alpha
11  - name: pf400
12  - name: peeler
13  - name: sealer
14  - name: biometra
15  - name: sciclops
16  - name: camera_module
17
18 #This is a list of steps in the workflow
19 #each step represents an action on a single module
20 flowdef:
21
22   #This is a human legible name for the step
23   - name: Sciclops gets plate from stacks
24
25   #This defines which module the action will run on
26   module: sciclops
27
28   #This tells the module which action in its library to run
29   action: get_plate
30
31   #These arguments specify the parameters for the action above
32   args:
33     loc: "tower2"
34
35   #This is a place for additional notes
36   comment: Stage pcr plates
37
38   - name: pf400 moves plate from sciclops to ot2
39     module: pf400
40     action: transfer
41     args:
42       source: sciclops.exchange
43       target: ot2_pcr_alpha.deck1_cooler
44       source_plate_rotation: narrow
45       target_plate_rotation: wide
46
47   - name: ot2 runs the "Mix_reactions" protocol
48     module: ot2_pcr_alpha
49     action: run_protocol
50     args:
51       config_path: PCR_prep_full_plate_multi_noresource.yaml
52       use_existing_resources: False
53

```

```

54 - name: pf400 moves plate from ot2 to sealer
55   module: pf400
56   action: transfer
57   args:
58     source: ot2_pcr_alpha.deck1_cooler
59     target: sealer.default
60     source_plate_rotation: wide
61     target_plate_rotation: narrow
62
63 - name: Seal plate in sealer
64   module: sealer
65   action: seal
66   args:
67     time: payload:seal.time
68     temperature: 175
69
70 - name: pf400 moves plate from sealer to biometra
71   module: pf400
72   action: transfer
73   args:
74     source: sealer.default
75     target: biometra.default
76     source_plate_rotation: narrow
77     target_plate_rotation: wide
78
79 - name: Close lid of biometra
80   module: biometra
81   action: close_lid
82
83 - name: Run biometra program
84   module: biometra
85   action: run_program
86   args:
87     program_n: 3
88
89 - name: Open lid of biometra
90   module: biometra
91   action: open_lid
92
93 - name: pf400 moves plate from biometra to peeler
94   module: pf400
95   action: transfer
96   args:
97     source: biometra.default
98     target: peeler.default
99     source_plate_rotation: wide
100    target_plate_rotation: narrow
101
102 - name: Peel plate
103   module: peeler
104   action: peel
105
106 - name: pf400 moves plate from peeler to camera
107   module: pf400
108   action: transfer
109   args:

```

```

110     source: peeler.default
111     target: camera_module.plate_station
112     source_plate_rotation: narrow
113     target_plate_rotation: narrow
114
115 - name: camera takes picture of plate
116   module: camera_module
117   action: take_picture
118   args:
119     file_name: "final_image.jpg"
120
121 - name: pf400 moves plate to final location
122   module: pf400
123   action: transfer
124   args:
125     source: camera_module.plate_station
126     target: wc.trash
127     source_plate_rotation: narrow
128     target_plate_rotation: narrow

```

---

### A.3 A second example workflow specification: Color mixing

We show here the YAML description of the second workflow, `cp_wf_mixcolor.yaml`, used by the color picker application described in [Section 4.1](#) and shown in [Section A.4](#).

Listing 3. Example workflow specification, `cp_wf_mixcolor.yaml`

```

1 name: Color Picker - Mix Colors - Workflow
2
3 metadata:
4   author: Tobias Ginsburg, Rafael Vescovi
5   info: Main workflow for the RPL Color Picker
6   version: 0.1
7
8 modules:
9   - name: ot2_cp_gamma
10  - name: pf400
11  - name: camera_module
12
13 flowdef:
14 - name: Move from Camera Module to OT2
15   module: pf400
16   command: transfer
17   args:
18     source: camera_module.positions.plate_station
19     target: ot2_cp_gamma.positions.deck2
20     source_plate_rotation: narrow
21     target_plate_rotation: wide
22   comment: Place plate in ot2
23
24 - name: Mix all colors
25   module: ot2_cp_gamma
26   command: run_protocol
27   args:
28     config_path: combined_protocol.yaml
29     color_A_volumes: payload.color_A_volumes

```

```

30     color_B_volumes: payload.color_B_volumes
31     color_C_volumes: payload.color_C_volumes
32     destination_wells: payload.destination_wells
33     use_existing_resources: payload.use_existing_resources
34     comment: Mix colors A, B and C portions according to input data
35
36 - name: Move to Picture
37   module: pf400
38   command: transfer
39   args:
40     source: ot2_cp_gamma.positions.deck2
41     target: camera_module.positions.plate_station
42     source_plate_rotation: wide
43     target_plate_rotation: narrow
44
45 - name: Take Picture
46   module: camera_module
47   command: take_picture
48   args:
49     file_name: "final_image.jpg"

```

---

#### A.4 An example application: Color picker

We present below a somewhat simplified version of the color-picker application described in [Section 4.1](#), which runs three workflows (including the `cp_wf_mixcolor.yaml` of [Section A.3](#)) on a workcell with a `pf400`, `ot2`, and `camera`. The Python program line runs a first workflow to get a new plate for subsequent use for color mixing (line 58). The program then runs a loop until the experiment budget is exhausted (line 63). In each iteration, it calculates what colors to mix (line 65), runs a second workflow to mix and image the colors (line 74), calls Globus Compute to run an image analysis program (line 79), and runs a Globus flow to publish relevant information (lines 116). Finally, it runs a third workflow to discard the used plate (line 123). Throughout, various logging commands publish events regarding significant occurrences, for consumption by external monitoring programs. This is done explicitly with `exp.events`, as in lines 62, 118, and 124, and also implicitly whenever a workflow is run.

Listing 4. Example application program, `color_picker_app.py`

---

```

1  # For extracting colors from each plate
2  from tools.plate_color_analysis import get_colors_from_file
3
4  from solvers.evolutionary_solver import EvolutionaryColorSolver
5  from globus_compute_sdk import Client
6  gcc = Client()
7
8  # For publishing to RPL Portal
9  from tools.publish_v2 import publish_iter
10
11 # For creating a payload that the OT2 will accept from the solver output
12 from tools.color_utils import convert_volumes_to_payload
13
14
15
16 # For running workflows, submits the job and waits for it to complete.
17 from tools.run_flow import run_flow
18
19 #For managing the overall experiment, generates a unique ID, handles logging and
    running flows. Is passed to the run_flow function to facilitate communication.
20 from rpl_wei.exp_app import Experiment
21

```

```

22 MAX_PLATE_SIZE = 96
23
24 def run(target_color, exp_budget, pop_size): #
25     # workflows used
26     wf_dir = Path("/home/rpl/workspace/rpl_workcell/color_picker_app/workflows")
27     init_workflow = wf_dir / "cp_wf_newplate.yaml"
28     loop_workflow = wf_dir / "cp_wf_mixcolor.yaml"
29     final_workflow = wf_dir / "cp_wf_trashplate.yaml"
30
31     # Constants
32     solver_out_dim = (pop_size, 3)
33
34     # Resource Tracking:
35     plate_n = 1 # total number of plates
36     current_iter = 0 # total number of iterations
37     num_exps = 0 # total number of wells used
38     curr_wells_used = [] # list of all wells used
39
40     # Information Tracking:
41     current_plate = None
42     cur_best_color = None
43     cur_best_diff = float("inf")
44     diffs = [] # List of all diffs from all runs of the experiment
45     payload = {} # Payload to be sent to the workflow runs
46
47     #Globus Compute Setup:
48     gc_endpoint = "299edea0-db9a-4693-84ba-babfa655b1be"
49
50     # Initialize the Experiment: start logging on the server and create log files.
51     # The events object is used to log important occurrences in application execution.
52     # Logging is also integrated in the run_flow and publish_iter functions
53     exp = Experiment("127.0.0.1", "8000", "Color_Picker")
54     exp.register_exp()
55
56     # Step 1: Run first workflow, to get a new plate
57     steps_run = []
58     steps_run, _ = run_flow(init_workflow, payload, steps_run, exp)
59     curr_wells_used = []
60
61     # Step 2: Repeatedly mix and image colors
62     exp.events.log_loop_start("Main Loop")
63     while num_exps + pop_size <= exp_budget:
64         # Step 2a: Calculate volumes and current wells for use in the OT2 protocol
65         plate_volumes = EvolutionaryColorSolver.run_iteration(
66             target_color,
67             current_plate,
68             pop_size=pop_size,
69             out_dim=(pop_size, 3),
70             return_volumes=True,
71         )
72
73         # Step 2b: Run second workflow, to mix colors
74         steps_run, run_info = run_flow(loop_workflow, payload, steps_run, exp)
75
76         # Step 2c: Analyze image: output should be list [pop_size, 3]
77         exp.events.log_globus_compute("get_color_from_file")

```



```

78     img_path = run_info["hist"]["Take Picture"]["action_msg"]
79     gc_result = gcc.run(get_colors_from_file, gc_endpoint, img_path)
80     plate_colors_ratios = gc_result.result()[1]
81
82     # Swap BGR to RGB
83     plate_colors_ratios = {a: b[::-1] for a, b in plate_colors_ratios.items()}
84
85     # Find the colors to be processed by the solver
86     current_plate = [],
87     wells_used = []
88     for well in payload["destination_wells"]:
89         color = plate_colors_ratios[well]
90         wells_used.append(well)
91         current_plate.append(color)
92
93     # save those and the initial colors, etc
94     exp.events.log_local_compute("find_best_color")
95     plate_best_color_ind, plate_diffs = EvolutionaryColorSolver._find_best_color(
96         current_plate, target_color, cur_best_color
97     )
98     plate_best_color = current_plate[plate_best_color_ind]
99     plate_best_diff =
100         EvolutionaryColorSolver._color_diff(plate_best_color, target_color)
101     diffs.append(plate_diffs)
102
103     # Find best colors
104     if plate_best_diff < cur_best_diff:
105         cur_best_diff = plate_best_diff
106         cur_best_color = plate_best_color
107
108     # Step 2d: Record best colors
109     report = {
110         "best_color": cur_best_color,
111         "best_diff": cur_best_diff
112     }
113
114     with open(folder_path / "report.txt") as f:
115         json.dump(report, f)
116     publish_iter(folder_path, dest_path, exp)
117
118     exp.events.log_loop_check(
119         "Sufficient wells in experiment budget", num_exps + pop_size <=
120     exp_budget
121     )
122
123     # Step 3: Run third workflow
124     steps_run, _ = run_flow(final_workflow, payload, steps_run)
125     exp.events.end_experiment()
126
127     # Run the application. Arguments are:
128     # Target color: RGB representation of target color
129     # Experiment budget: Number of colors to mix and image in total
130     # Population size: Number of colors to mix and image at a time
131     run( [120, 120, 120], 100, 10 )

```

## A.5 Pointers to code

The applications, workflows, and protocols discussed in this paper, other than for the Thin Film application, are available publicly on GitHub. For each of the repositories discussed, a tagged release under "Digital Discovery Paper" can be found with the version of the codes used in this work. See <https://ad-sdl.github.io/wei2023> for summary information and pointers. Below, we provide pointers to relevant individual code files. In addition, the main core of the workflow executor is here: <https://github.com/AD-SDL/wei>.

### A.5.1 Color Picker

Application: [https://github.com/AD-SDL/rpl\\_workcell/blob/main/color\\_picker\\_app/color\\_picker\\_application.py](https://github.com/AD-SDL/rpl_workcell/blob/main/color_picker_app/color_picker_application.py)

Workflows:

- [https://github.com/AD-SDL/rpl\\_workcell/blob/main/color\\_picker\\_app/workflows/cp\\_wf\\_newplate.yaml](https://github.com/AD-SDL/rpl_workcell/blob/main/color_picker_app/workflows/cp_wf_newplate.yaml)
- [https://github.com/AD-SDL/rpl\\_workcell/blob/main/color\\_picker\\_app/workflows/cp\\_wf\\_mixcolor.yaml](https://github.com/AD-SDL/rpl_workcell/blob/main/color_picker_app/workflows/cp_wf_mixcolor.yaml)
- [https://github.com/AD-SDL/rpl\\_workcell/blob/main/color\\_picker\\_app/workflows/cp\\_wf\\_trashplate.yaml](https://github.com/AD-SDL/rpl_workcell/blob/main/color_picker_app/workflows/cp_wf_trashplate.yaml)

OT2 protocol: [https://github.com/AD-SDL/rpl\\_workcell/blob/main/color\\_picker\\_app/protocol\\_files/combined\\_protocol.yaml](https://github.com/AD-SDL/rpl_workcell/blob/main/color_picker_app/protocol_files/combined_protocol.yaml)

Solver: [https://github.com/AD-SDL/rpl\\_workcell/blob/main/color\\_picker\\_app/solvers/evolutionary\\_solver.py](https://github.com/AD-SDL/rpl_workcell/blob/main/color_picker_app/solvers/evolutionary_solver.py)

### A.5.2 PCR

Application: [https://github.com/AD-SDL/rpl\\_workcell/blob/main/pcr\\_app/pcr\\_full\\_application.py](https://github.com/AD-SDL/rpl_workcell/blob/main/pcr_app/pcr_full_application.py)

Workflow: [https://github.com/AD-SDL/rpl\\_workcell/blob/main/pcr\\_app/workflows/pcr\\_demo\\_wf.yaml](https://github.com/AD-SDL/rpl_workcell/blob/main/pcr_app/workflows/pcr_demo_wf.yaml)

OT2 protocol: [https://github.com/AD-SDL/rpl\\_workcell/blob/main/pcr\\_app/protocol\\_files/PCR\\_prep\\_full\\_plate\\_multi\\_noresource.yaml](https://github.com/AD-SDL/rpl_workcell/blob/main/pcr_app/protocol_files/PCR_prep_full_plate_multi_noresource.yaml)

### A.5.3 Growth curve

Application: [https://github.com/AD-SDL/BIO\\_workcell/blob/main/growth\\_app/growth\\_curve\\_app.py](https://github.com/AD-SDL/BIO_workcell/blob/main/growth_app/growth_curve_app.py)

Workflows:

- [https://github.com/AD-SDL/BIO\\_workcell/blob/main/growth\\_app/workflows/create\\_plate\\_T0.yaml](https://github.com/AD-SDL/BIO_workcell/blob/main/growth_app/workflows/create_plate_T0.yaml)
- [https://github.com/AD-SDL/BIO\\_workcell/blob/main/growth\\_app/workflows/read\\_plate\\_T12.yaml](https://github.com/AD-SDL/BIO_workcell/blob/main/growth_app/workflows/read_plate_T12.yaml)

The code used to generate the solo protocol is at [https://github.com/AD-SDL/BIO\\_workcell/blob/main/growth\\_app/tools/hudson\\_solo\\_auxillary/hso\\_functions.py](https://github.com/AD-SDL/BIO_workcell/blob/main/growth_app/tools/hudson_solo_auxillary/hso_functions.py)

### A.5.4 Pendant drop

Application: [https://github.com/AD-SDL/8IDI\\_workcell/blob/main/droplet\\_app/droplet\\_app.py](https://github.com/AD-SDL/8IDI_workcell/blob/main/droplet_app/droplet_app.py)

Workflow: [https://github.com/AD-SDL/8IDI\\_workcell/blob/main/droplet\\_app/workflows/demo.yaml](https://github.com/AD-SDL/8IDI_workcell/blob/main/droplet_app/workflows/demo.yaml)

### A.5.5 Electrochromic Polymers

Application: [https://github.com/AD-SDL/rpl\\_workcell/blob/main/polybot\\_app/demo\\_app.py](https://github.com/AD-SDL/rpl_workcell/blob/main/polybot_app/demo_app.py)

Workflow: [https://github.com/AD-SDL/rpl\\_workcell/blob/main/polybot\\_app/workflows/demo.yaml](https://github.com/AD-SDL/rpl_workcell/blob/main/polybot_app/workflows/demo.yaml)
